1 **Natural variation in *Caenorhabditis elegans* responses to the anthelmintic**  
2 **emodepside**

3 Janneke Wit<sup>a</sup>, Briana C. Rodriguez<sup>a</sup>, and Erik C. Andersen<sup>a,‡</sup>

4 <sup>a</sup>Molecular Biosciences, Northwestern University, Evanston, IL 60208

5 **‡Corresponding Author:**

6 Erik C. Andersen, Ph.D.

7 Department of Molecular Biosciences

8 Northwestern University

9 4619 Silverman Hall

10 2205 Tech Drive

11 Evanston, IL 60208

12 847-467-4382

13 erik.andersen@northwestern.edu

14 Janneke: 0000-0002-3116-744X

15 Briana: 0000-0002-5282-0815

16 Erik: 0000-0003-0229-9651

17 **Journal:** *IJP DDR*<sup>1</sup>

18 **Keywords:** Emodepside, natural variation, *C. elegans*, anthelmintics, hormetic effect

---

<sup>1</sup> Note: Supplementary data associated with this article.

## 19 Graphical abstract

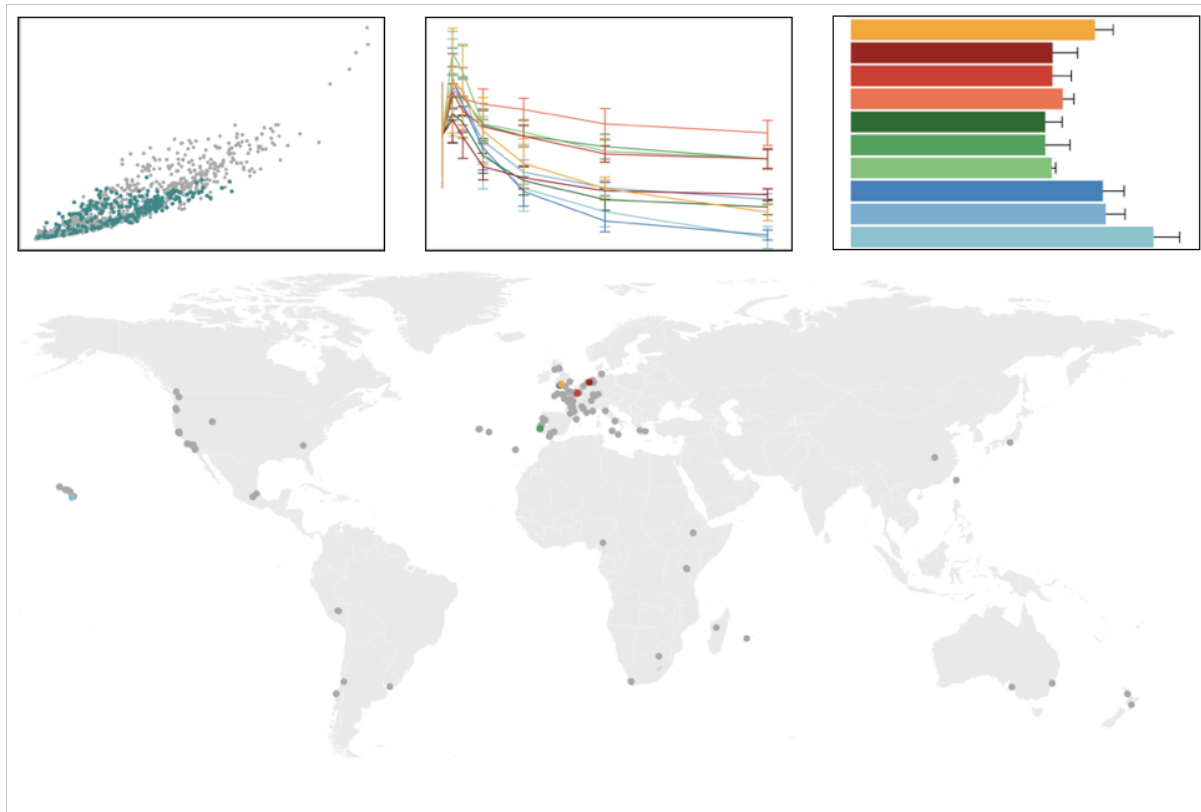

20 **Highlights (3-5, max 85 characters each):**

- 21       ● Emodepside responses vary across the *C. elegans* species.
- 22       ● Wild strains of *C. elegans* model natural differences in parasite emodepside
- 23       responses.
- 24       ● Variation in the emodepside target *slo-1* and other loci correlate with
- 25       resistance.
- 26       ● Low doses of emodepside cause a hormetic effect on offspring production.

27 **Abstract**

28 Treatment of parasitic nematode infections depends primarily on the use of  
29 anthelmintics. However, this drug arsenal is limited, and resistance against most  
30 anthelmintics is widespread. Emodepside is a new anthelmintic drug effective  
31 against gastrointestinal and filarial nematodes. Nematodes that are resistant to other  
32 anthelmintic drug classes are susceptible to emodepside, indicating that the  
33 emodepside mode of action is distinct from previous anthelmintics. The laboratory-  
34 adapted *Caenorhabditis elegans* strain N2 is sensitive to emodepside, and genetic  
35 selection and *in vitro* experiments implicated *slo-1*, a BK potassium channel gene, in  
36 emodepside mode of action. In an effort to understand how natural populations will  
37 respond to emodepside, we measured brood sizes and developmental rates of wild  
38 *C. elegans* strains after exposure to the drug and found natural variation across the  
39 species. Some of the observed variation in *C. elegans* emodepside responses  
40 correlates with amino acid substitutions in *slo-1*, but genetic mechanisms other than  
41 *slo-1* coding variants likely underlie emodepside resistance in wild *C. elegans*  
42 strains. Additionally, the assayed strains have higher offspring production in low  
43 concentrations of emodepside (a hormetic effect), which could impact treatment  
44 strategies when parasites are underdosed. We find that natural variation affects  
45 emodepside sensitivity, supporting the suitability of *C. elegans* as a model system to  
46 study emodepside responses across natural nematode populations.

## 47 1. Introduction

48 Helminth infections are a major threat to animal and human health, and  
49 control measures depend heavily on a small arsenal of anthelmintic drugs.  
50 Resistance against most anthelmintic drug classes is widespread and documented  
51 for several species (Kotze and Prichard, 2016; McKellar and Jackson, 2004). New  
52 anthelmintics with a distinct mode of action can be used to treat populations resistant  
53 to multiple anthelmintics, but the introduction of new compounds is rare (Epe and  
54 Kaminsky, 2013). One of the newest anthelmintics, the cyclooctadepsipeptide  
55 (COPD) emodepside, has been commercially available since 2007 (Epe and  
56 Kaminsky, 2013). It is a semisynthetic derivative of a natural metabolite from the  
57 fungus *Mycelia sterilia* (Harder and von Samson-Himmelstjerna, 2001). As a broad  
58 spectrum anthelmintic, emodepside is efficacious against gastrointestinal nematodes  
59 and filarial nematodes (Harder et al., 2003; Zahner et al., 2001) and is currently  
60 approved for treatment of helminth infections of cats and dogs in combination with  
61 praziquantel (Altreuther et al., 2005). Field resistance has not been reported since its  
62 introduction (Prichard, 2017). Importantly, emodepside is effective against multi-drug  
63 resistant parasitic nematode strains, including ivermectin- and levamisole-resistant  
64 *Haemonchus contortus* (Harder et al., 2005; von Samson-Himmelstjerna et al.,  
65 2005).

66 Responses to COPD have been studied in both parasitic nematodes and the  
67 free-living nematode *Caenorhabditis elegans*. Initial *in vitro* studies using *Ascaris*  
68 *suum* suggested that the COPD PF1022A, the parent compound in emodepside  
69 synthesis (Jeschke et al., 2005), displaces GABAergic ligands from somatic muscle  
70 preparations (Harder et al., 2005). However, later work comparing the effect of  
71 GABA and emodepside on the rate of relaxation of contracted *A. suum* muscle

72 showed that emodepside does not act directly on the GABAergic pathway (Willson et  
73 al., 2003; Willson J, Holden-Dye L, Harder A, Walker RJ, 2001). Another promising  
74 lead was the identification of a putative target protein, HC110-R, from a *H. contortus*  
75 cDNA library (Saeger et al., 2001). Alignment revealed HC110-R had 48% identity  
76 and 76% similarity to the *C. elegans* latrophilin receptor LAT-1. Although predicted to  
77 be a heptahelical transmembrane protein, the exact function of HC110-R is unknown  
78 (Mühlfeld et al., 2009). Latrophilin is a G protein-coupled receptor in the secretin  
79 receptor family and a Ca<sup>2+</sup>-independent receptor of alpha-latrotoxin (Welz et al.,  
80 2005). *C. elegans* larvae express *lat-1* in pharyngeal muscle, and adults express it in  
81 both pharyngeal and non-pharyngeal neurons (Willson et al., 2004). In the laboratory  
82 strain N2, emodepside inhibits pharyngeal pumping, egg-laying, as well as  
83 locomotion (Bull et al., 2007). Putative null mutations in *lat-1* are less sensitive to  
84 emodepside-induced inhibition of pharyngeal pumping, but locomotor activity is  
85 inhibited (Guest et al., 2007; Willson et al., 2004). This inhibition of locomotion  
86 suggests that emodepside affects additional pathways independent of *lat-1*.

87 A subsequent mutagenesis screen using *C. elegans* identified mutations in  
88 the Ca<sup>2+</sup>-activated K<sup>+</sup> channel (BK-channel) gene *slo-1* in nine emodepside resistant  
89 mutants (Guest et al., 2007). These mutants were identified as highly resistant to  
90 inhibition of both pharyngeal pumping and locomotor activity by emodepside. Gain-  
91 of-function mutations in *slo-1* show decreased locomotion and pharyngeal pumping  
92 similar to emodepside-treated nematodes (Davies et al., 2003), suggesting that  
93 emodepside activates SLO-1 signaling. Additionally, a putative *slo-1* null allele, *slo-*  
94 *1(js379)*, responded to emodepside treatment like mutants from the screen (Guest et  
95 al., 2007). Tissue-specific rescue experiments in the putative *slo-1* null background  
96 showed that emodepside inhibited locomotion by *slo-1* expressed in both neurons

97 and body wall muscle (Guest et al., 2007). However, feeding was inhibited by  
98 emodepside effects on pharyngeal-specific neurons alone and not through muscle.  
99 Subsequently, emodepside was shown to open SLO-1 channels expressed in  
100 *Xenopus laevis* oocytes (Kulke et al., 2014). Taken together, these results suggest  
101 that emodepside acts mainly through a *slo-1* dependent pathway, and that the drug  
102 opens SLO-1 channels to inhibit locomotion and pharyngeal pumping in *C. elegans*.

103 The above studies on emodepside mode of action and resistance in *C.*  
104 *elegans* focused on the N2 laboratory strain and mutants in that genetic background.  
105 Although *C. elegans* is a great model organism for parasitic nematodes (Bürglin et  
106 al., 1998; Dilks et al., 2020; Hahnel et al., 2018), studies that use only a single strain  
107 can be biased by rare variation or genetic modifiers specific to a single genetic  
108 background (Sterken et al., 2015). The observation that emodepside affects multiple  
109 nematode species suggests that its mode of action is conserved throughout the  
110 phylum. It is unlikely that one *C. elegans* strain represents all possible genes and  
111 variants that contribute to emodepside sensitivity. The use of multiple isolates in drug  
112 response studies increases the likelihood of elucidating mechanisms of resistance  
113 and drug mode of action shared by multiple strains and species (Hahnel et al., 2020;  
114 Wit et al., 2020). Natural variation across the *C. elegans* species is archived in the *C.*  
115 *elegans* Natural Diversity Resource (CeNDR) (Cook et al., 2017) and offers a  
116 powerful approach to look for genetic variation that underlies the different responses  
117 to emodepside, as has been done for other drugs (Brady et al., 2019; Evans and  
118 Andersen, 2020; Hahnel et al., 2018; Zamanian et al., 2018; Zdraljevic et al., 2019,  
119 2017).

120 Here, we measured emodepside responses in a set of *C. elegans* wild strains  
121 to demonstrate that the effect of this anthelmintic on development and brood size

122 depends on the genetic background. Across a set of nine wild strains and the  
123 laboratory strain N2, we show that natural coding variation in *slo-1* is correlated with  
124 differences in response to emodepside, but that additional variation impacts  
125 emodepside responses. This result illustrates the need for broader comparisons of  
126 anthelmintic resistance within a species, as variation in genes other than *slo-1* might  
127 affect emodepside susceptibility. Additionally, it highlights the power of using *C.*  
128 *elegans* natural variation for studies of emodepside mode of action and resistance  
129 because this variation might recapitulate diversity present in parasite populations.

130

## 131 **2. Materials and Methods**

132

### 133 **2.1 Strains**

134 Animals were maintained at 20°C on modified nematode growth medium  
135 (NGMA) containing 1% agar and 0.7% agarose seeded with the *E. coli* strain OP50  
136 (Andersen et al., 2014). The laboratory strain N2 and a set of nine wild strains from  
137 the *C. elegans* Natural Diversity Resource (CeNDR) were used to study the  
138 response to multiple doses of emodepside and to determine the EC<sub>50</sub>. Additionally,  
139 two *slo-1* putative loss-of-function mutant strains, BZ142 and NM1968, were  
140 obtained from the *Caenorhabditis* Genetics Center.

141

### 142 **2.2 High-throughput fitness assays**

143 The high-throughput fitness assays (HTAs) were performed using the COPAS  
144 BIOSORT (Union Biometrica, Holliston MA) as described previously (Hahnel et al.,  
145 2018; Zdraljevic et al., 2017). In summary, the strains were grown in uncrowded  
146 conditions to avoid the induction of dauer for four generations on NMGA plates at



147 20°C prior to each assay. Gravid adults from the fifth generation were bleach-  
148 synchronized, and embryos were titered at one embryo per microliter of K medium  
149 (Boyd et al., 2012) into 96-well microtiter plates and incubated overnight. Hatched L1  
150 larvae were fed with 5 mg/mL HB101 lysate (Pennsylvania State University Shared  
151 Fermentation Facility, State College, PA (García-González et al., 2017)) and cultured  
152 for 48 hours at 20°C with constant shaking. Three L4 larvae were then sorted into  
153 new microtiter plates containing K medium, 10 mg/mL HB101 lysate, 50 µM  
154 kanamycin, and either 1% DMSO or emodepside dissolved in 1% DMSO.

155       After sorting, animals were cultured and allowed to reproduce for 96 hours at  
156 20°C with constant shaking. For accurate nematode length measurements, the  
157 samples were treated with sodium azide (50 mM in M9) to straighten their bodies  
158 before analysis using the COPAS BIOSORT. The COPAS BIOSORT is a large  
159 particle flow measurement device (**Figure 1**), which measures time-of-flight (TOF),  
160 extinction (EXT), and fluorescence of objects passing through the flow cell using  
161 laser beams. Animal length and optical density measure nematode development  
162 because animals get longer and more dense as they progress through development.  
163 If animals are negatively affected by emodepside, they are expected to be smaller,  
164 less optically dense, and have smaller brood sizes. Animal optical density is  
165 corrected for animal length (median.norm.EXT) for each object in each well. Object  
166 counts are used to calculate brood size (norm.n), which is the number of objects  
167 passing the laser corrected for the number of parent animals sorted into the well.

168       To determine concentrations to measure differences in emodepside  
169 responses across wild strains, a dose response assay was performed using three  
170 genetically divergent *C. elegans* strains (N2, CB4856, and DL238) and four  
171 increasing concentrations of emodepside (19.6, 39.1, 78.1, and 156.3 nM). A second

172 dose response with 9.8, 19.6, 39.1, 78.1, 156.3, and 312.5 nM emodepside was  
173 performed using nine wild strains (JU751, WN2001, NIC258, NIC265, NIC271,  
174 JU782, DL238, CB4932, and JU2586), two putative *slo-1* null mutants (BZ142 and  
175 NM1968), and the N2 strain. These 12 strains were assayed in six separate assays  
176 with four replicates in each assay. Raw phenotypic data were processed for outliers  
177 and analyzed using the R package *easysorter* (Shimko and Andersen, 2014) as  
178 described previously (Hahnel et al., 2018). For each strain, all phenotypic values  
179 were normalized by deducting the average trait value in control (DMSO) conditions.

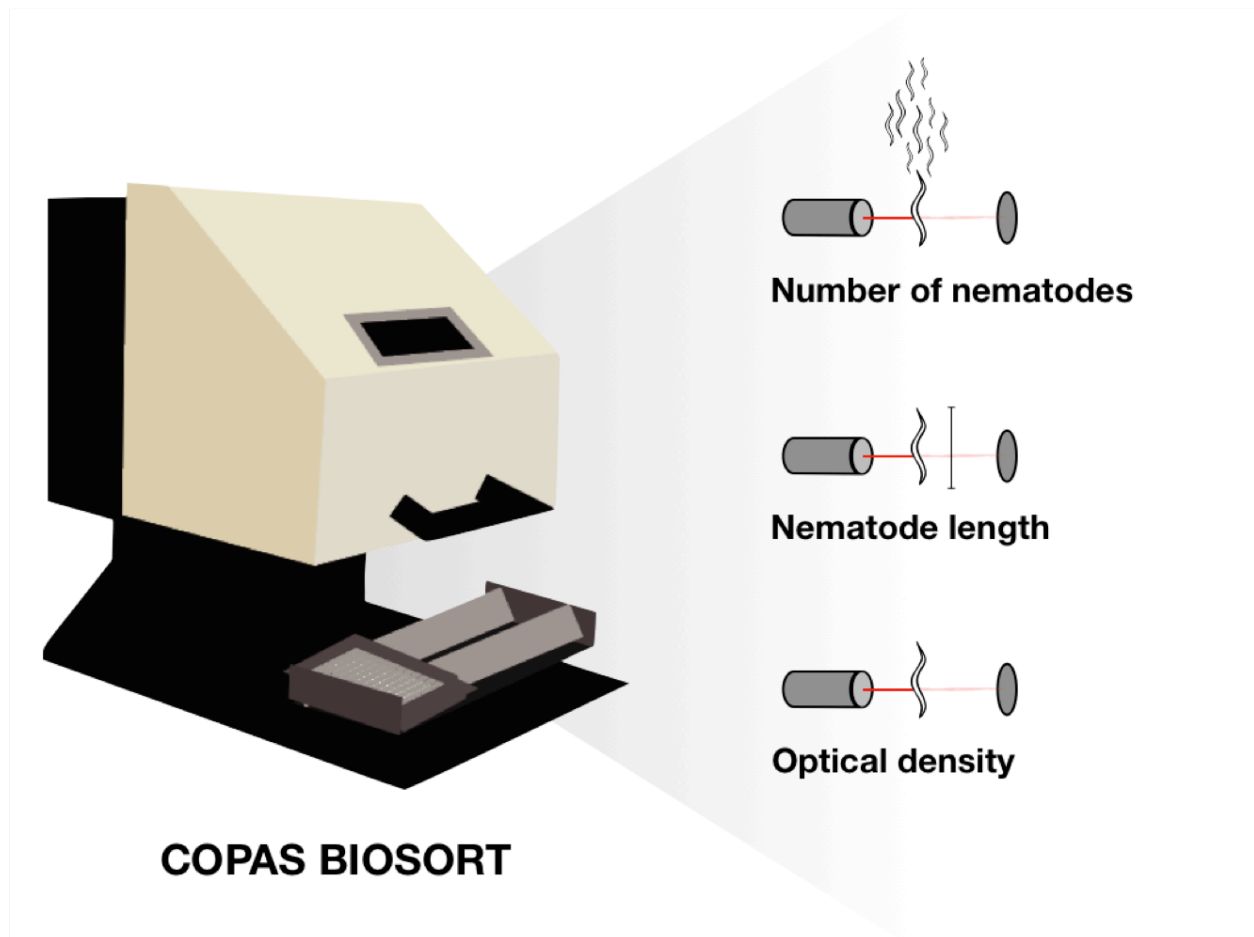

180 **Figure 1**

181 Using a COPAS BIOSORT, three independent traits were used to measure nematode responses to  
182 emodepside: brood size, nematode length ( $\mu\text{m}$ ), and optical density.

### 183 **2.3 Half maximal effective concentration (EC<sub>50</sub>) calculations**

184 To test if emodepside had an effect on any of the three traits across the range  
185 of concentrations, extreme outliers per dose were identified and removed if values  
186 were greater or less than three times the interquartile range from the first or third  
187 quartile, respectively, using the `identify_outliers` from the R package *Rstatix*  
188 (Kassambara, 2020). A Kruskal-Wallis test was performed for each strain (phenotype  
189 ~ dose) using the *rstatix* package (Kassambara, 2020). For strains where  
190 emodepside had a phenotypic effect, the concentration with the highest response  
191 was determined. To calculate the half maximal effective concentration (EC<sub>50</sub>), the  
192 concentration at which 50% of the drug effect is reached, we could not fit from the  
193 control condition because of the hormetic effect (explained below). Instead, we fitted  
194 a linear model (developmental trait or brood size ~ dose) to the data from the dose  
195 with the peak phenotypic value to the highest concentration (312.5 nM) assayed and  
196 calculated the concentration at the midpoint of the phenotypic effect. These EC<sub>50</sub>  
197 values were calculated for each strain in each of the six assays and then the mean  
198 and standard deviation of each EC<sub>50</sub> were calculated.

199

### 200 **2.4 Data availability**

201 **Supplementary File 1** contains the phenotypic values for N2 and two putative  
202 *slo-1* null mutants in response to increasing concentrations of emodepside.

203 **Supplementary File 2** contains the phenotypic values for N2, CB4856, and DL238  
204 in response to increasing concentrations of emodepside. **Supplementary File 3**  
205 contains the raw extinction (EXT) and time of flight (TOF) measurements for N2 and  
206 two wild *C. elegans* strains (CB4856 and DL238) in control conditions and 78.1 nM  
207 emodepside. **Supplementary File 4** contains the phenotypic values for the N2 strain

208 and nine wild *C. elegans* strains in response to increasing concentrations of  
209 emodepside. All data and scripts to generate figures can be found at  
210 [https://github.com/AndersenLab/emodepside\\_manuscript](https://github.com/AndersenLab/emodepside_manuscript).

211

### 212 **3. Results**

213

#### 214 **3.1 Putative *slo-1* null mutants are resistant to emodepside in the high-** 215 **throughput reproduction and development assays**

216 We assayed emodepside resistance as a function of nematode reproduction  
217 and development. These traits were measured for thousands of animals using a  
218 previously developed high-throughput assay (HTA) (see Methods, **Figure 1**)  
219 (Andersen et al., 2015; Brady et al., 2019; Evans et al., 2020, 2018; Evans and  
220 Andersen, 2020; Hahnel et al., 2018; Zamanian et al., 2018; Zdraljevic et al., 2019,  
221 2017). In this assay, three L4 larvae were sorted into each well of a 96-well plate and  
222 allowed to grow and reproduce for 96 hours in the presence of DMSO or  
223 emodepside dissolved in DMSO. Each well contained these three parents and their  
224 offspring. After 96 hours, animal length and optical density, which are both proxies  
225 for nematode developmental stage (Andersen et al., 2015), were measured for all  
226 progeny in the well. Animals grow longer and more dense over time, and  
227 anthelmintics slow this development. Therefore, shorter and less optically dense  
228 animals after 96 hours show that emodepside had a detrimental effect on  
229 development. In addition to development, we also measured brood size as the  
230 average number of progeny produced within the 96-hour window. Although ultimate  
231 brood size and demography of the population influence statistical summaries of  
232 nematode development as measured by size (mean.TOF) or optical density

233 (median.norm.EXT), a smaller brood size shows emodepside sensitivity  
234 (**Supplementary Figure 1**).

235 To confirm that our HTA could be used to quantitatively measure *C. elegans*  
236 emodepside resistance, we measured animal development and brood size for two  
237 putative *slo-1* null mutant strains, BZ142 and NM1968, and the laboratory strain, N2,  
238 across a range of concentrations. The *slo-1* mutants were shown previously to be  
239 resistant to emodepside based on locomotion and pharyngeal pumping assays  
240 (Guest et al., 2007), and the N2 strain is known to be sensitive to emodepside.  
241 Brood size and development were both inhibited in the N2 strain (Kruskal-Wallis,  
242 brood size:  $p = 1.49 \times 10^{-42}$ , animal length:  $p = 4.32 \times 10^{-37}$ , optical density:  $p = 1.25 \times 10^{-39}$ ),  
243 suggesting that the N2 strain is indeed sensitive to emodepside in the HTA.  
244 Although development was not affected by emodepside for either mutant strain  
245 (Kruskal-Wallis, BZ142 animal length:  $p = 0.27$  and optical density:  $p = 0.15$ , and  
246 NM1968 animal length:  $p = 0.60$  and optical density:  $p = 0.12$ , **Figure 2**,  
247 **Supplementary File 1**), the mutant strains both had higher brood sizes than the N2  
248 strain in emodepside (Kruskal-Wallis, BZ142:  $p = 4.87 \times 10^{-11}$  and NM1968:  $p =$   
249  $6.97 \times 10^{-3}$ ). Brood sizes of these putative null mutant strains were not affected even  
250 at high concentrations of emodepside (Kruskal-Wallis, brood size in increasing  
251 concentrations of emodepside: BZ142,  $p = 0.30$  and NM1968,  $p = 0.26$ ). This result  
252 confirms that the mutant strains are indeed resistant to emodepside. By contrast,  
253 both BZ142 and NM1968 had lower brood sizes than the N2 strain in control  
254 conditions, indicating that *slo-1* plays a role in reproduction (**Supplementary Figure**  
255 **2**, **Supplementary File 1**). Both deletion strains also had smaller average animal  
256 lengths and lower optical densities than the N2 strain in control DMSO conditions  
257 (**Supplementary Figure 2**, **Supplementary File 1**), which again demonstrates that

258 the putative *slo-1* null mutants are less fit than the N2 strain in control conditions.

259 These results recapitulate previous studies and illustrate the applicability of the HTA

260 to study emodepside responses in *C. elegans*.

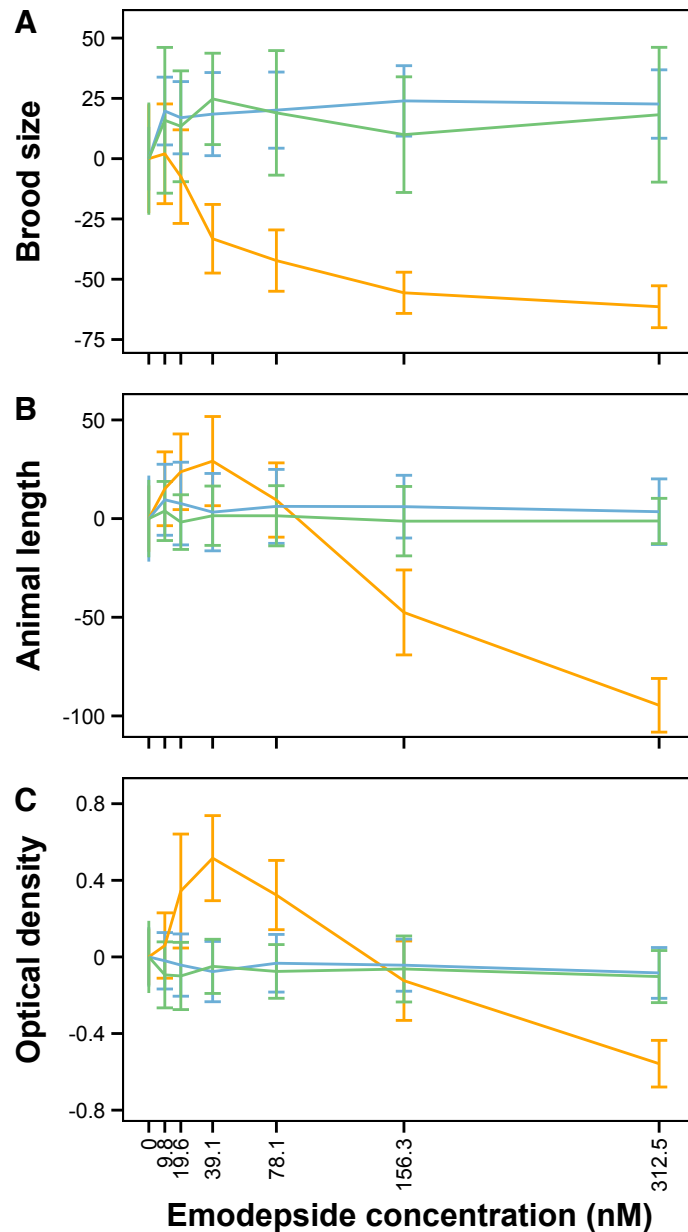

261 **Figure 2**

262 Dose response curves for (A) brood size, (B) animal length, and (C) optical density of the N2 strain

263 (orange) and two *slo-1* putative null mutant strains (BZ142 = blue, NM1968 = green). Phenotypic

264 response values on the y-axis are corrected for the average strain response in control DMSO

265 conditions.

### 266 **3.2 Natural differences in emodepside response are heritable**

267 Previous studies of *C. elegans* resistance to emodepside have been  
268 conducted using the N2 strain or mutant strains in the N2 genetic background.  
269 Assaying natural variation in *C. elegans* was previously shown to be a powerful tool  
270 to identify genetic variation that correlates with differences in benzimidazole  
271 responses (Hahnel et al., 2018). To test if the response to emodepside varies by  
272 genetic background, we exposed a panel of three genetically divergent *C. elegans*  
273 wild strains (N2, CB4856, and DL238) to increasing concentrations of emodepside.  
274 At 78.1 nM emodepside, the phenotypic variation was maximized among strains and  
275 minimized within replicates of the same strain as shown by broad-sense heritabilities  
276 of 88% for brood size, 61% for animal length, and 60% for optical density  
277 (**Supplementary Figure 3, Supplementary File 2**). At this concentration, N2  
278 animals were both shorter and less optically dense in the presence of emodepside  
279 compared to animals grown in control (DMSO) conditions, showing that development  
280 was delayed (**Figure 3A, Supplementary File 3**). The CB4856 and DL238 strains  
281 were less affected by this emodepside concentration (**Figure 3B, Supplementary**  
282 **File 3**). These differential responses across the strains and the high heritabilities  
283 suggest that genetic factors underlie natural variation in emodepside responses.

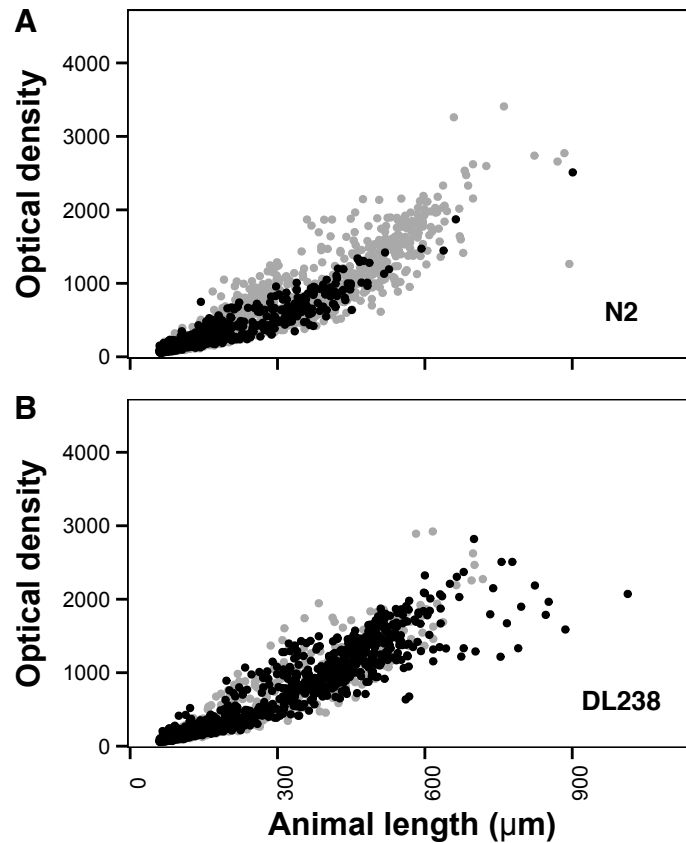

284 **Figure 3**

285 Plots of length and optical density values are shown for each nematode from (A) the sensitive  
286 laboratory-adapted strain N2 strain and (B) a more resistant wild strain from Hawaii, DL238. The gray  
287 points are nematodes grown in the presence of DMSO (control conditions), and the black points are  
288 nematodes grown in the presence of DMSO and 78.1 nM emodepside (emodepside conditions). C.  
289 *elegans* grows longer and more optically dense as it ages, and anthelmintic effects can be measured  
290 as changes in the demography of animals such that developmental delay is observed as smaller and  
291 less dense animals. Here, the DL238 strain was resistant to emodepside because it grew equally well  
292 in both control and emodepside conditions.



### 293 **3.3 Emodepside affects brood size and development in a dose-dependent** 294 **manner**

295 To describe the effects of genetic background on development and brood size  
296 in response to emodepside in more detail, we selected nine genetically diverse wild  
297 strains and the N2 strain for a second dose response assay to more highly replicate  
298 natural differences across the species. We detected significant variation in the dose-  
299 dependent responses to emodepside among strains (broad-sense heritabilities at  
300 78.1 nM: 59.5% for brood size, 70.8% for animal length, and 70.8% for optical  
301 density). The sensitive laboratory strain N2 falls in the middle of this range,  
302 demonstrating that some wild strains are more susceptible to emodepside than the  
303 N2 strain and other strains are more resistant (**Figure 4, Supplementary File 4**). At  
304 the highest concentration of 312.5 nM emodepside, development and brood size  
305 were reduced for all strains. Although high concentrations of emodepside were  
306 shown to have detrimental effects on brood size and development, low  
307 concentrations of emodepside actually produced larger brood sizes compared to  
308 control conditions (**Figure 5, Supplementary Figure 4, Supplementary File 4**).  
309 This positive effect on fitness at low concentrations of the drug is called a hormetic  
310 effect (Bukowski and Lewis, 2000). For developmental traits the identification of a  
311 potential hormetic response is confounded by increased reproduction, because  
312 strains that develop further in low concentrations of emodepside start producing a  
313 second generation. This second generation increases the observed brood size, but  
314 also decreases the average length and optical density of the population because the  
315 next generation of early larval stage animals are short and not optically dense  
316 (**Supplementary Figure 1**). Regardless of the presence of a hormetic effect for

317 development, the increased brood size at low doses of emodepside suggests  
318 emodepside causes a hormetic effect on reproduction.

319 We next calculated the concentration with half of the maximal drug effect  
320 ( $EC_{50}$ ) for each of the strains and all three traits (**Figure 4 D-F, Supplementary File**  
321 **4**). For all traits, the  $EC_{50}$  was significantly affected by genetic diversity across the  
322 strains that were assayed (Kruskal-Wallis, brood size:  $p = 0.0422$ , animal length:  $p =$   
323  $4.56 \times 10^{-7}$ , optical density:  $p = 1.21 \times 10^{-6}$ ). Overall, these results demonstrate that natural  
324 variation in *C. elegans* affects the emodepside response, indicating that this model  
325 provides an excellent system to study the genetics of emodepside mode of action  
326 and resistance.

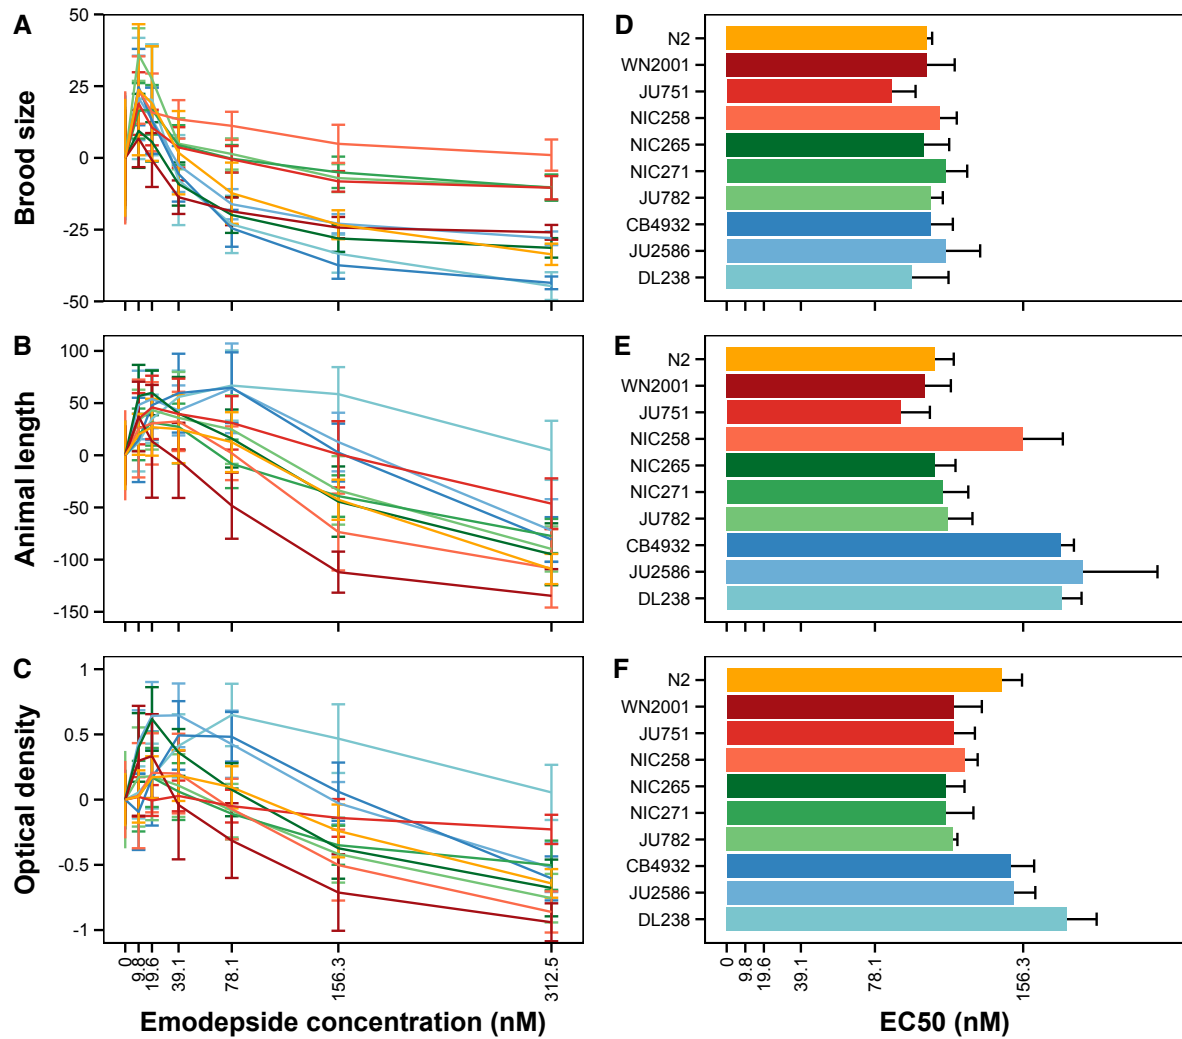

327 **Figure 4**

328 Dose response curves of nine wild *C. elegans* strains and N2 of (A) brood size, (B) animal length, and  
329 (C) optical density are shown on the left. Phenotypic response values on the y-axis are corrected for  
330 the average strain response in control DMSO conditions. Average EC<sub>50</sub> values per strain for (D) brood  
331 size, (E) animal length, and (F) optical density are shown on the right.

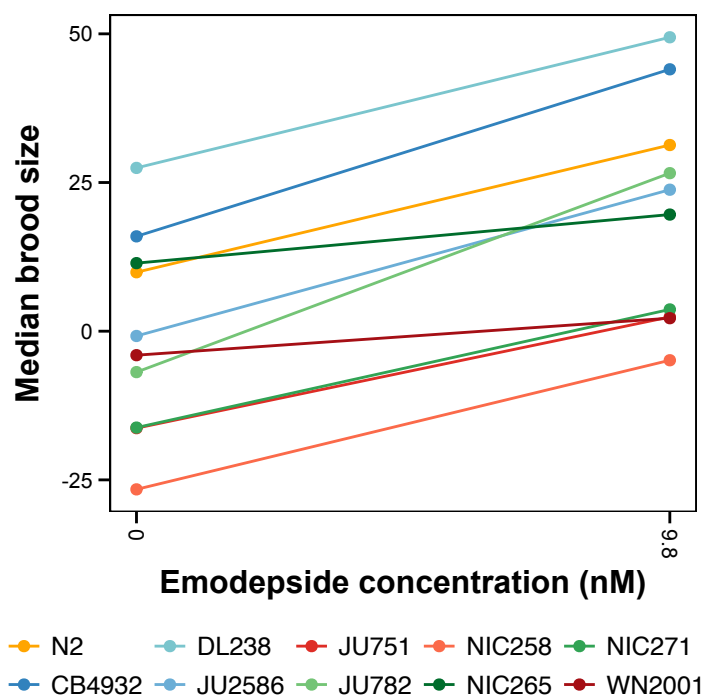

332 **Figure 5**

333 Plot of median brood sizes at the control condition (DMSO) and at 9.8 nM emodepside for ten *C.*  
334 *elegans* strains. Statistical significance of the phenotypic response in DMSO compared to 9.8 nM  
335 emodepside was calculated using a pairwise Wilcoxon test. All strains, except NIC265, showed a  
336 significant ( $p < 0.05$ ) hormetic effect.

337

### 338 **3.4 Natural variation in candidate gene *slo-1* correlates with resistance in** 339 **reproduction but not development in wild *C. elegans* strains**

340 Emodepside has been shown to directly interact with and open the *C. elegans*  
341 SLO-1 channel (Kulke et al., 2014), and putative *slo-1* null mutants are resistant to  
342 emodepside treatment (**Figure 2, Supplementary File 1** (Guest et al., 2007)).  
343 Because of these results, we expected that genetic variation in *slo-1* with a predicted  
344 moderate or high deleterious effect on gene function would correlate with  
345 emodepside resistance. Of nine wild strains assayed here, four (NIC258, NIC265,  
346 NIC271, and JU782) have the same four predicted variations in SLO-1 (Arg134Trp,  
347 Leu327Phe, Cys328Leu, and Arg678Leu) that causes deleterious amino acid

348 substitutions with a summed BLOSUM score of -6 (Henikoff and Henikoff, 1992).  
349 This variation correlated with higher EC<sub>50</sub> values for brood size but lower EC<sub>50</sub> values  
350 for development (Kruskal-Wallis, brood size:  $p = 0.0221$ , animal length:  $p = 0.263$ ,  
351 optical density:  $p = 3.35 \times 10^{-5}$ ).

352 We also investigated natural variation in another candidate gene for  
353 emodepside resistance, *lat-1* (Saeger et al., 2001; Willson et al., 2004). All nine wild  
354 strains in the dose response assay harbor natural variants in *lat-1*. To investigate if  
355 that variation is predicted to affect *lat-1* function, we summed BLOSUM scores for  
356 each of the wild strains. Only the DL238 strain had a negative BLOSUM score (-1),  
357 and this score was not correlated with resistance across all strains (Kruskal-Wallis,  
358 brood size:  $p = 0.223$ , animal length:  $p = 0.223$ , and optical density:  $p = 0.117$ ). In  
359 this set of ten strains, variation in *lat-1* does not underlie differences in emodepside  
360 responses. Because strains vary in emodepside responses, our results indicate that  
361 amino acid variation in *slo-1* or *lat-1* does not explain all differences in emodepside  
362 responses, suggesting that additional genetic mechanisms affect the response to  
363 emodepside.

364

#### 365 **4. Discussion**

366 Emodepside is a broad range anthelmintic with a distinct mode of action  
367 compared to other anthelmintics (Epe and Kaminsky, 2013). Previous studies of  
368 emodepside sensitivity and phenotypic effects in *C. elegans* have focussed on the  
369 laboratory strain N2 (Bull et al., 2007; Guest et al., 2007; Willson et al., 2004). In this  
370 strain, emodepside inhibits egg-laying, pharyngeal pumping, development, and  
371 locomotion. In the present study, sensitivity to emodepside was measured across  
372 wild *C. elegans* strains, the N2 strain, and two putative *slo-1* null mutants (BZ142

373 and NM1968) using a large-particle flow cytometer high-throughput assay (HTA)  
374 (**Figure 1**). Resistance to emodepside caused by the putative loss-of-function *slo-1*  
375 mutants was confirmed using the HTA. Additionally, the effects of emodepside on  
376 brood size and development varied across the wild strains (**Figures 3 and 4,**  
377 **Supplementary Files 3 and 4**) and was correlated with protein-coding variation in  
378 the resistance candidate gene *slo-1*. Importantly, we found that low doses of  
379 emodepside have a hormetic effect on brood size in *C. elegans*. Hormesis was  
380 observed in the N2 laboratory strain and eight out of nine wild strains, regardless of  
381 their susceptibility to emodepside (**Figure 4, Supplementary File 4**). This consistent  
382 hormetic effect across the wild *C. elegans* strains included in our study suggests that  
383 emodepside might also cause a hormetic effect in parasitic nematodes. This study  
384 shows the power of using natural variation in *C. elegans* to study emodepside  
385 responses.

386

#### 387 **4.1 High-throughput assays across wild strains show the effects of** 388 **emodepside on development and reproduction**

389 In the present study, development and reproductive success in the presence  
390 of emodepside was measured for the N2 strain and a set of wild *C. elegans* strains  
391 using a HTA. Previously, reproduction was measured on agar plates (Bull et al.,  
392 2007), where both the timing and the quantity of egg laying was measured. Using the  
393 HTA, brood size is assayed as the overall reproductive success of three L4 larvae  
394 over a 96-hour period. Results from agar-based assays and HTA are highly  
395 correlated, and HTA intra- and inter-assay correlations are substantially greater  
396 compared to agar plate-based methods (Andersen et al., 2015). On agar plates,  
397 emodepside prevents egg laying, and the animals are bloated with embryos at

398 higher drug concentrations (20 nM - 500 nM) (Bull et al., 2007). In the HTA,  
399 reproduction was inhibited for the N2 strain as well as the wild strains at  
400 concentrations similar to previous studies (19.6  $\mu$ M to 312.5 nM), confirming that  
401 brood size in response to emodepside can be measured reproducibly with both  
402 assays. Agar-based developmental rate, based on the percentage of eggs that hatch  
403 and reach different larval stages in increasing concentrations of emodepside, is  
404 delayed (Bull et al., 2007). The HTA measures animal length and optical density of a  
405 population established by three L4 larvae over a 96-hour period. The two lowest  
406 concentrations of emodepside, 9.8 nM and 19.8 nM, have either no effect on  
407 development or a hormetic effect. Higher concentrations (39.1  $\mu$ M to 312.5 nM),  
408 which overlap with the effective concentrations from the agar-based development  
409 phenotypes, negatively affect animal length and optical density (**Figure 4**). The  
410 results from both the agar-based and HTA methods indicate that emodepside inhibits  
411 reproduction at lower concentrations than development. Emodepside inhibited  
412 reproduction from approximately 20 nM and up, compared to approximately 40 nM  
413 and up for development. The agar-based study did not find a hormetic effect, but our  
414 results suggest that such an effect is likely to be present at concentrations below the  
415 range tested on agar plates. Our results show that the HTA provides a platform to  
416 screen hundreds of strains efficiently and that the different measures of reproduction  
417 and development are similarly affected across assay platforms.

418

## 419 **4.2 Natural variation affects development and brood size in the presence of** 420 **emodepside**

421 The response of *C. elegans* to emodepside is affected by natural genetic  
422 variation (**Figure 4, Supplementary File 4**). Our results showed that all strains are

423 affected by emodepside, and that higher doses inhibit development, as measured by  
424 animal length and optical density, and reproduction, as measured by brood size  
425 (**Figure 4, Supplementary File 4**). For brood size, strain-specific differences were  
426 correlated with variation in *slo-1* where strains with predicted deleterious variation  
427 were more resistant to emodepside treatments. However, strains with higher brood  
428 sizes at lower concentrations do not have variation in *slo-1*, suggesting that the  
429 hormetic effect is not mediated by *slo-1*. It will be informative to introduce *slo-1*  
430 variation in the wild strains with higher fitness using CRISPR-Cas9 genome editing  
431 to test if *slo-1* variation reduces brood size in a more resistant background. Our  
432 results show that reproduction and development are inhibited by higher  
433 concentrations of emodepside, and that natural variation affects the extent of this  
434 response. Future measurements of emodepside responses across additional wild  
435 isolates will improve the power to detect candidate resistance genes across the  
436 species using genome-wide association studies.

437

### 438 **4.3 Hormetic effects of emodepside suggest a potential risk of treatment failure** 439 **at suboptimal doses**

440         Nine of ten strains showed a hormetic response in reproduction when treated  
441 with a low emodepside concentration (**Figure 4 A-C, Figure 5, Supplementary File**  
442 **4**). The presence of hormetic responses across strains illustrates that hormesis is a  
443 common response to low concentrations of emodepside across *C. elegans* strains. If  
444 this response is shared with parasitic nematodes, then experimental designs to  
445 calculate EC<sub>50</sub> values in parasites need to account for this effect. A low EC<sub>50</sub>  
446 estimate caused by a hormetic effect can lead to recommended treatment doses that  
447 will be insufficient to treat parasitic nematode infections. Underdosing is a known risk



448 factor for the selection of resistance against all anthelmintics (Sangster et al., 2018;  
449 Silvestre et al., 2001; Smith et al., 1999). If hormetic doses are administered, either  
450 because of erroneous EC<sub>50</sub> calculations or as a result of other treatment factors like  
451 ineffective drug delivery (Sangster et al., 2018), the infection might be intensified  
452 rather than treated. Our results also imply that low doses of emodepside are  
453 beneficial rather than detrimental for nematode growth. To prevent hormesis from  
454 rendering emodepside treatment ineffective, it is essential to investigate hormetic  
455 effects and adjust treatment recommendations accordingly.

456

#### 457 **4.4 Natural variation in *C. elegans* can facilitate the study of anthelmintic** 458 **resistance**

459 The free-living nematode *C. elegans* is a long standing model to study  
460 anthelmintic mode of action and resistance of parasitic nematodes (Geary and  
461 Thompson, 2001; Hahnel et al., 2020; Holden-Dye et al., 2014; Wit et al., 2020). The  
462 suitability of *C. elegans* as a model is the result of a range of attributes, including the  
463 phylogenetic relationship of *C. elegans* with many parasitic nematodes of human and  
464 veterinary importance, its short and direct life cycle, a wide range of genome-editing  
465 tools, and its high-quality reference genome and gene models. Additionally, larval  
466 stages of many parasitic nematodes occupy the same niches as *C. elegans*  
467 (Crombie et al., 2019; Frézal and Félix, 2015). Similar environmental stressors,  
468 including naturally occurring precursors of anthelmintics (Alivisatos et al., 1962;  
469 Campbell, 2012, 2005), can cause similar selective pressures for both species to  
470 evolve resistance.

471 Previous studies on the emodepside resistance candidate gene *lat-1*, showed  
472 that putative *lat-1* null mutants were resistant in reproduction and pharyngeal

473 pumping assays, but sensitive in locomotion assays (Guest et al., 2007), and that  
474 putative *slo-1* null mutants are resistant in all assays. Here, we show that although  
475 putative *slo-1* null mutants are resistant to emodepside treatment, *slo-1* variation is  
476 not the only determinant of resistance across wild strains. These results imply that  
477 multiple genes likely affect the response to emodepside. To identify these genes,  
478 genetic variation across wild strains can be correlated with phenotypic responses to  
479 emodepside. Genes identified based on population-wide variation are more likely to  
480 translate to other species than genes identified based on one genetic background.  
481 After identification of candidate genes, genetic variation in these genes should be  
482 tested in a controlled genetic background by introducing specific mutations using  
483 CRISPR-Cas9 genome editing (Dilks et al., 2020).

484

#### 485 **Declaration of competing interests**

486 The authors have no competing financial or personal interests that impacted the  
487 work presented in this manuscript.

488

#### 489 **Acknowledgements**

490 We would like to thank members of the Andersen laboratory for their technical  
491 assistance and helpful comments on the manuscript. This work was supported by  
492 R01 AI153088 to E.C.A. We would also like to thank Wormbase and the *C. elegans*  
493 Natural Diversity Resource (CeNDR) for data and tools critical for our analyses of  
494 natural variation (NSF CSBR 1930382). The *slo-1* mutant strains (BZ142 and  
495 NM1968) were provided by the *Caenorhabditis* Genetics Center, which is funded by  
496 NIH Office of Research Infrastructure Programs (P40 OD010440).

497 **References**

- 498 Alivisatos, S.G., Lamantia, L., Matijevitch, B.L., 1962. Imidazolytic processes. VI.  
499 Enzymic formation of benzimidazole and 5,6-dimethylbenzimidazole containing  
500 dinucleotides. *Biochim. Biophys. Acta* 58, 209–217.
- 501 Altreuther, G., Buch, J., Charles, S.D., Davis, W.L., Krieger, K.J., Radeloff, I., 2005.  
502 Field evaluation of the efficacy and safety of emodepside/praziquantel spot-on  
503 solution against naturally acquired nematode and cestode infections in domestic  
504 cats. *Parasitol. Res.* 97 Suppl 1, S58–S64.
- 505 Andersen, E.C., Bloom, J.S., Gerke, J.P., Kruglyak, L., 2014. A variant in the  
506 neuropeptide receptor *npr-1* is a major determinant of *Caenorhabditis elegans*  
507 growth and physiology. *PLoS Genet.* 10, e1004156.
- 508 Andersen, E.C., Shimko, T.C., Crissman, J.R., Ghosh, R., Bloom, J.S., Seidel, H.S.,  
509 Gerke, J.P., Kruglyak, L., 2015. A Powerful New Quantitative Genetics Platform,  
510 Combining *Caenorhabditis elegans* High-Throughput Fitness Assays with a  
511 Large Collection of Recombinant Strains. *G3* 5, 911–920.
- 512 Boyd, W.A., Smith, M.V., Freedman, J.H., 2012. *Caenorhabditis elegans* as a Model  
513 in Developmental Toxicology. *Methods in Molecular Biology*.  
514 [https://doi.org/10.1007/978-1-61779-867-2\\_3](https://doi.org/10.1007/978-1-61779-867-2_3)
- 515 Brady, S.C., Zdraljevic, S., Bisaga, K.W., Tanny, R.E., Cook, D.E., Lee, D., Wang,  
516 Y., Andersen, E.C., 2019. A Novel Gene Underlies Bleomycin-Response  
517 Variation in *Caenorhabditis elegans*. *Genetics* 212, 1453–1468.
- 518 Bukowski, J.A., Lewis, R.J., 2000. Hormesis and health: a little of what you fancy  
519 may be good for you. *South. Med. J.* 93, 371–374.
- 520 Bull, K., Cook, A., Hopper, N.A., Harder, A., Holden-Dye, L., Walker, R.J., 2007.  
521 Effects of the novel anthelmintic emodepside on the locomotion, egg-laying

- 522 behaviour and development of *Caenorhabditis elegans*. *Int. J. Parasitol.* 37,  
523 627–636.
- 524 Bürglin, T.R., Lobos, E., Blaxter, M.L., 1998. *Caenorhabditis elegans* as a model for  
525 parasitic nematodes. *International Journal for Parasitology*.  
526 [https://doi.org/10.1016/s0020-7519\(97\)00208-7](https://doi.org/10.1016/s0020-7519(97)00208-7)
- 527 Campbell, W.C., 2012. History of avermectin and ivermectin, with notes on the  
528 history of other macrocyclic lactone antiparasitic agents. *Curr. Pharm.*  
529 *Biotechnol.* 13, 853–865.
- 530 Campbell, W.C., 2005. Serendipity and new drugs for infectious disease. *ILAR J.* 46,  
531 352–356.
- 532 Cook, D.E., Zdraljevic, S., Roberts, J.P., Andersen, E.C., 2017. CeNDR, the  
533 *Caenorhabditis elegans* natural diversity resource. *Nucleic Acids Res.* 45,  
534 D650–D657.
- 535 Crombie, T.A., Zdraljevic, S., Cook, D.E., Tanny, R.E., Brady, S.C., Wang, Y.,  
536 Evans, K.S., Hahnel, S., Lee, D., Rodriguez, B.C., Zhang, G., van der Zwagg,  
537 J., Kiontke, K., Andersen, E.C., 2019. Deep sampling of Hawaiian  
538 *Caenorhabditis elegans* reveals high genetic diversity and admixture with global  
539 populations. *Elife* 8, e50465.
- 540 Davies, A.G., Pierce-Shimomura, J.T., Kim, H., VanHoven, M.K., Thiele, T.R., Bonci,  
541 A., Bargmann, C.I., McIntire, S.L., 2003. A Central Role of the BK Potassium  
542 Channel in Behavioral Responses to Ethanol in *C. elegans*. *Cell*.  
543 [https://doi.org/10.1016/s0092-8674\(03\)00979-6](https://doi.org/10.1016/s0092-8674(03)00979-6)
- 544 Dilks, C.M., Hahnel, S., Sheng, Q., Long, L., McGrath, P.T., Andersen, E.C., 2020.  
545 Quantitative benzimidazole resistance and fitness effects of parasitic nematode  
546 beta-tubulin alleles. *International Journal for parasitology: Drugs and Drug*

- 547 Resistance 14, 28–36.
- 548 Epe, C., Kaminsky, R., 2013. New advancement in anthelmintic drugs in veterinary  
549 medicine. Trends Parasitol. 29, 129–134.
- 550 Evans, K.S., Andersen, E.C., 2020. The Gene *scb-1* Underlies Variation in  
551 *Caenorhabditis elegans* Chemotherapeutic Responses. G3 .  
552 <https://doi.org/10.1534/g3.120.401310>
- 553 Evans, K.S., Brady, S.C., Bloom, J.S., Tanny, R.E., Cook, D.E., Giuliani, S.E.,  
554 Hippleheuser, S.W., Zamanian, M., Andersen, E.C., 2018. Shared Genomic  
555 Regions Underlie Natural Variation in Diverse Toxin Responses. Genetics.  
556 <https://doi.org/10.1534/genetics.118.301311>
- 557 Evans, K.S., Zdraljevic, S., Stevens, L., Collins, K., Tanny, R.E., Andersen, E.C.,  
558 2020. Natural variation in the sequestosome-related gene, *sqst-5*, underlies zinc  
559 homeostasis in *Caenorhabditis elegans*. PLoS Genet. 16, e1008986.
- 560 Frézal, L., Félix, M.-A., 2015. *C. elegans* outside the Petri dish. Elife 4.  
561 <https://doi.org/10.7554/eLife.05849>
- 562 García-González, A.P., Ritter, A.D., Shrestha, S., Andersen, E.C., Safak Yilmaz, L.,  
563 Walhout, A.J.M., 2017. Bacterial Metabolism Affects the *C. elegans* Response  
564 to Cancer Chemotherapeutics. Cell. <https://doi.org/10.1016/j.cell.2017.03.046>
- 565 Geary, T.G., Thompson, D.P., 2001. *Caenorhabditis elegans*: how good a model for  
566 veterinary parasites? Veterinary Parasitology. [https://doi.org/10.1016/s0304-](https://doi.org/10.1016/s0304-4017(01)00562-3)  
567 [4017\(01\)00562-3](https://doi.org/10.1016/s0304-4017(01)00562-3)
- 568 Guest, M., Bull, K., Walker, R.J., Amliwala, K., O'Connor, V., Harder, A., Holden-  
569 Dye, L., Hopper, N.A., 2007. The calcium-activated potassium channel, *SLO-1*,  
570 is required for the action of the novel cyclo-octadepsipeptide anthelmintic,  
571 emodepside, in *Caenorhabditis elegans*. Int. J. Parasitol. 37, 1577–1588.

- 572 Hahnel, S.R., Dilks, C.M., Heisler, I., Andersen, E.C., Kulke, D., 2020.  
573 *Caenorhabditis elegans* in anthelmintic research – Old model, new perspectives.  
574 International Journal for Parasitology: Drugs and Drug Resistance.  
575 <https://doi.org/10.1016/j.ijpddr.2020.09.005>
- 576 Hahnel, S.R., Zdraljovic, S., Rodriguez, B.C., Zhao, Y., McGrath, P.T., Andersen,  
577 E.C., 2018. Extreme allelic heterogeneity at a *Caenorhabditis elegans* beta-  
578 tubulin locus explains natural resistance to benzimidazoles. PLoS Pathog. 14,  
579 e1007226.
- 580 Harder, A., Holden-Dye, L., Walker, R., Wunderlich, F., 2005. Mechanisms of action  
581 of emodepside. Parasitol. Res. 97 Suppl 1, S1–S10.
- 582 Harder, A., Schmitt-Wrede, H.-P., Krücken, J., Marinovski, P., Wunderlich, F.,  
583 Willson, J., Amliwala, K., Holden-Dye, L., Walker, R., 2003.  
584 Cyclooctadepsipeptides—an anthelmintically active class of compounds  
585 exhibiting a novel mode of action. Int. J. Antimicrob. Agents 22, 318–331.
- 586 Harder, A., von Samson-Himmelstjerna, G., 2001. Activity of the cyclic depsipeptide  
587 emodepside (BAY 44-4400) against larval and adult stages of nematodes in  
588 rodents and the influence on worm survival. Parasitol. Res. 87, 924–928.
- 589 Henikoff, S., Henikoff, J.G., 1992. Amino acid substitution matrices from protein  
590 blocks. Proc. Natl. Acad. Sci. U. S. A. 89, 10915–10919.
- 591 Holden-Dye, L., Southampton Neuroscience Group (SoNG), Centre for Biological  
592 Sciences, University of Southampton, 1bj, S.S., UK., Walker, R.J., 2014.  
593 Anthelmintic drugs and nematicides: studies in *Caenorhabditis elegans*.  
594 WormBook. <https://doi.org/10.1895/wormbook.1.143.2>
- 595 Jeschke, R., Iinuma, K., Harder, A., Schindler, M., Murakami, T., 2005. Influence of  
596 the cyclooctadepsipeptides PF1022A and PF1022E as natural products on the

- 597 design of semi-synthetic anthelmintics such as emodepside. *Parasitol. Res.* 97  
598 Suppl 1, S11–S16.
- 599 Kassambara, A., 2020. rstatix: pipe-friendly framework for basic statistical tests. R  
600 package version 0.4. 0.
- 601 Kotze, A.C., Prichard, R.K., 2016. Anthelmintic Resistance in *Haemonchus*  
602 *contortus*: History, Mechanisms and Diagnosis. *Adv. Parasitol.* 93, 397–428.
- 603 Kulke, D., von Samson-Himmelstjerna, G., Miltsch, S.M., Wolstenholme, A.J., Jex,  
604 A.R., Gasser, R.B., Ballesteros, C., Geary, T.G., Keiser, J., Townson, S.,  
605 Harder, A., Krücken, J., 2014. Characterization of the Ca<sup>2+</sup>-gated and voltage-  
606 dependent K<sup>+</sup>-channel Slo-1 of nematodes and its interaction with emodepside.  
607 *PLoS Negl. Trop. Dis.* 8, e3401.
- 608 McKellar, Q.A., Jackson, F., 2004. Veterinary anthelmintics: old and new. *Trends*  
609 *Parasitol.* 20, 456–461.
- 610 Mühlfeld, S., Schmitt-Wrede, H.-P., Harder, A., Wunderlich, F., 2009. FMRFamide-  
611 like neuropeptides as putative ligands of the latrophilin-like HC110-R from  
612 *Haemonchus contortus*. *Mol. Biochem. Parasitol.* 164, 162–164.
- 613 Prichard, R.K., 2017. Drug Resistance in Nematodes, in: Mayers, D.L., Sobel, J.D.,  
614 Ouellette, M., Kaye, K.S., Marchaim, D. (Eds.), *Antimicrobial Drug Resistance:*  
615 *Mechanisms of Drug Resistance, Volume 1.* Springer International Publishing,  
616 Cham, pp. 689–704.
- 617 Saeger, B., Schmitt-Wrede, H.P., Dehnhardt, M., Benten, W.P., Krücken, J., Harder,  
618 A., Von Samson-Himmelstjerna, G., Wiegand, H., Wunderlich, F., 2001.  
619 Latrophilin-like receptor from the parasitic nematode *Haemonchus contortus* as  
620 target for the anthelmintic depsipeptide PF1022A. *FASEB J.* 15, 1332–1334.
- 621 Sangster, N.C., Cowling, A., Woodgate, R.G., 2018. Ten Events That Defined

- 622 Anthelmintic Resistance Research. *Trends Parasitol.* 34, 553–563.
- 623 Shimko, T.C., Andersen, E.C., 2014. COPASutils: an R package for reading,  
624 processing, and visualizing data from COPAS large-particle flow cytometers.  
625 *PLoS One* 9, e111090.
- 626 Silvestre, A., Cabaret, J., Humbert, J.F., 2001. Effect of benzimidazole under-dosing  
627 on the resistant allele frequency in *Teladorsagia circumcincta* (Nematoda).  
628 *Parasitology* 123, 103–111.
- 629 Smith, G., Grenfell, B.T., Isham, V., Cornell, S., 1999. Anthelmintic resistance  
630 revisited: under-dosing, chemoprophylactic strategies, and mating probabilities.  
631 *Int. J. Parasitol.* 29, 77–91; discussion 93–4.
- 632 Sterken, M.G., Snoek, L.B., Kammenga, J.E., Andersen, E.C., 2015. The laboratory  
633 domestication of *Caenorhabditis elegans*. *Trends Genet.* 31, 224–231.
- 634 von Samson-Himmelstjerna, G., Harder, A., Sangster, N.C., Coles, G.C., 2005.  
635 Efficacy of two cyclooctadepsipeptides, PF1022A and emodepside, against  
636 anthelmintic-resistant nematodes in sheep and cattle. *Parasitology* 130, 343–  
637 347.
- 638 Welz, C., Harder, A., Schnieder, T., Høglund, J., von Samson-Himmelstjerna, G.,  
639 2005. Putative G protein-coupled receptors in parasitic nematodes--potential  
640 targets for the new anthelmintic class cyclooctadepsipeptides? *Parasitol. Res.*  
641 97 Suppl 1, S22–S32.
- 642 Willson, J., Amliwala, K., Davis, A., Cook, A., Cuttle, M.F., Kriek, N., Hopper, N.A.,  
643 O'Connor, V., Harder, A., Walker, R.J., Holden-Dye, L., 2004. Latrotoxin  
644 Receptor Signaling Engages the UNC-13-Dependent Vesicle-Priming Pathway  
645 in *C. elegans*. *Current Biology*. <https://doi.org/10.1016/j.cub.2004.07.056>
- 646 Willson, J., Amliwala, K., Harder, A., Holden-Dye, L., Walker, R.J., 2003. The effect



647 of the anthelmintic emodepside at the neuromuscular junction of the parasitic  
648 nematode *Ascaris suum*. *Parasitology*.  
649 <https://doi.org/10.1017/s0031182002002639>

650 Willson J, Holden-Dye L, Harder A, Walker RJ, 2001. A possible mechanism for the  
651 action of the novel anthelmintic emodepside, using *Ascaris suum* body wall  
652 muscle preparations. *J. Physiol.* 536, 132P–133P.

653 Wit, J., Dilks, C., Andersen, E., 2020. Complementary Approaches to Understand  
654 Anthelmintic Resistance Using Free-Living and Parasitic Nematodes. *Trends in*  
655 *Parasitology*. <https://doi.org/10.20944/preprints202008.0313.v1>

656 Zahner, H., Taubert, A., Harder, A., von Samson-Himmelstjerna, G., 2001. Filaricidal  
657 efficacy of anthelmintically active cyclodepsipeptides. *Int. J. Parasitol.* 31, 1515–  
658 1522.

659 Zamanian, M., Cook, D.E., Zdraljevic, S., Brady, S.C., Lee, D., Lee, J., Andersen,  
660 E.C., 2018. Discovery of genomic intervals that underlie nematode responses to  
661 benzimidazoles. *PLoS Negl. Trop. Dis.* 12, e0006368.

662 Zdraljevic, S., Fox, B.W., Strand, C., Panda, O., Tenjo, F.J., Brady, S.C., Crombie,  
663 T.A., Doench, J.G., Schroeder, F.C., Andersen, E.C., 2019. Natural variation in  
664 *C. elegans* arsenic toxicity is explained by differences in branched chain amino  
665 acid metabolism. *Elife* 8. <https://doi.org/10.7554/eLife.40260>

666 Zdraljevic, S., Strand, C., Seidel, H.S., Cook, D.E., Doench, J.G., Andersen, E.C.,  
667 2017. Natural variation in a single amino acid substitution underlies  
668 physiological responses to topoisomerase II poisons. *PLoS Genet.* 13,  
669 e1006891.
